# Supplementary material for: His18 promotes reactive oxidative stress production in copper-ion mediated human islet amyloid polypeptide aggregation
Source: Royal Society of Chemistry journal article supplement (doi:10.1039/c9ra09943c), 2020-01-01
Supplement: c9ra09943c1.pdf [file c9ra09943c1.pdf]

## Supporting Materials

### **His18 Promotes the Reactive Oxidative Stress Production in Copper-ion Mediated Human Islet Amyloid Polypeptide Aggregation**

Gengyang Huo<sup>a</sup>, Wenyong Chen<sup>a</sup>, Jianhua Wang<sup>a</sup>, Xinxing Chu<sup>a,b</sup>, Wei Xu<sup>a</sup>, Bin Li<sup>b</sup>, Yi Zhang<sup>b</sup>, Binqian Xu<sup>c</sup>, Xingfei Zhou<sup>a\*</sup>

<sup>a</sup> School of Physics Science and Technology, Ningbo University, China

<sup>b</sup> Shanghai Advanced Research Institute, Chinese Academy of Sciences, China

<sup>c</sup> Single Molecule Study Laboratory, College of Engineering, University of Georgia, Athens, Georgia 30602, USA

\*zhouxingfei@nbu.edu.cn

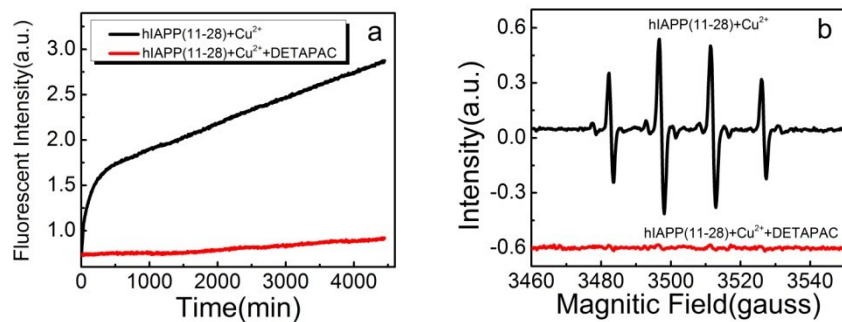

**Figure S1.** (a) H<sub>2</sub>O<sub>2</sub> formation monitored by Amplex Red in the presence and absence of DETAPAC during the aggregation of hIAPP(11-28) co-incubated with Cu(II). (b) Hydroxyl radical EPR signal (DMPO spin trap) in the presence or absence of DETAPAC after 50 hours incubation of hIAPP(11-28) with Cu(II).

## Thioflavin T(ThT) assay

A Fluoroskan ascent fluorescence spectrophotometer (Thermo Scientific Inc., USA) was used to record the kinetics of fibril formation progress. The fluorescence intensity was recorded every 5 minutes by using 440 nm excitation and 484 nm emission filters. To prepare samples for fluorescence,  $\text{Cu}^{2+}$  with different concentrations (2, 10, 100 and 200  $\mu\text{M}$ ), 100  $\mu\text{M}$  hIAPP(11-28) and 50  $\mu\text{M}$  ThT were added in 96-well microtitre plate (Corning Inc., USA). At least four set of measurements were carried out for each tested concentration of metal ions. And the final results were averaged.

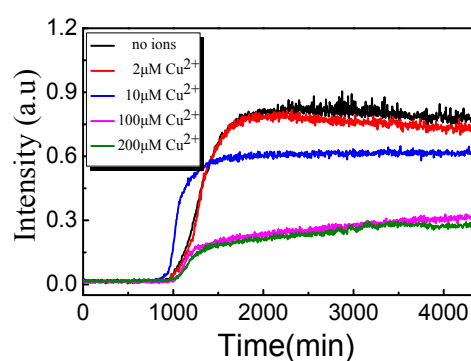

**Figure S2.** Kinetic analysis of hIAPP(11-28) fibril formation monitored by ThT fluorescence in the absence (black) and presence of 2 (red), 10 (blue), 100 (magenta), and 200  $\mu\text{M}$  (olive)  $\text{Cu}^{2+}$ .

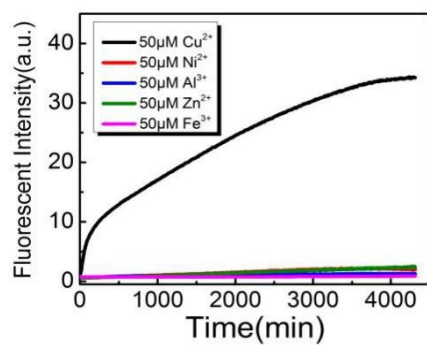

**Figure S3.** Kinetic analysis of H<sub>2</sub>O<sub>2</sub> formation monitored by Amplex Red method in the presence of Cu<sup>2+</sup> (black), Ni<sup>2+</sup> (red), Al<sup>3+</sup> (blue), Zn<sup>2+</sup> (green) and Fe<sup>3+</sup> (magenta) on the aggregation of hIAPP(11-28).

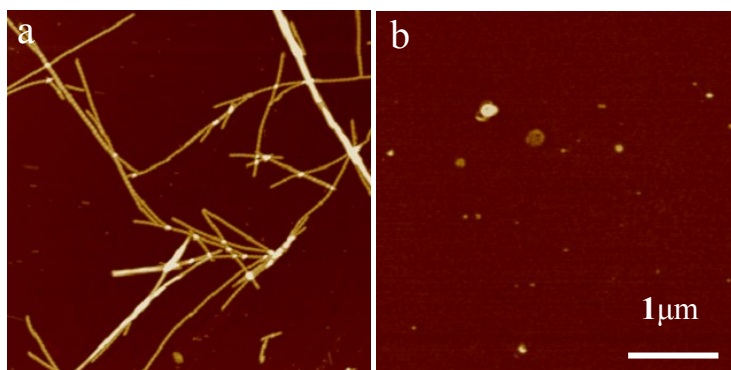

**Figure S4.** AFM images hIAPP and rIAPP fragments incubated at 37°C for one day. (a) hIAPP (11-28) and (b) rIAPP(11-28).
